# Supplementary material
Source: publisher figshare collection journal article supplement (https://aacr.figshare.com/articles/dataset/_/23391296)
Supplement: Supplementary file 1 [file 41119895]

A

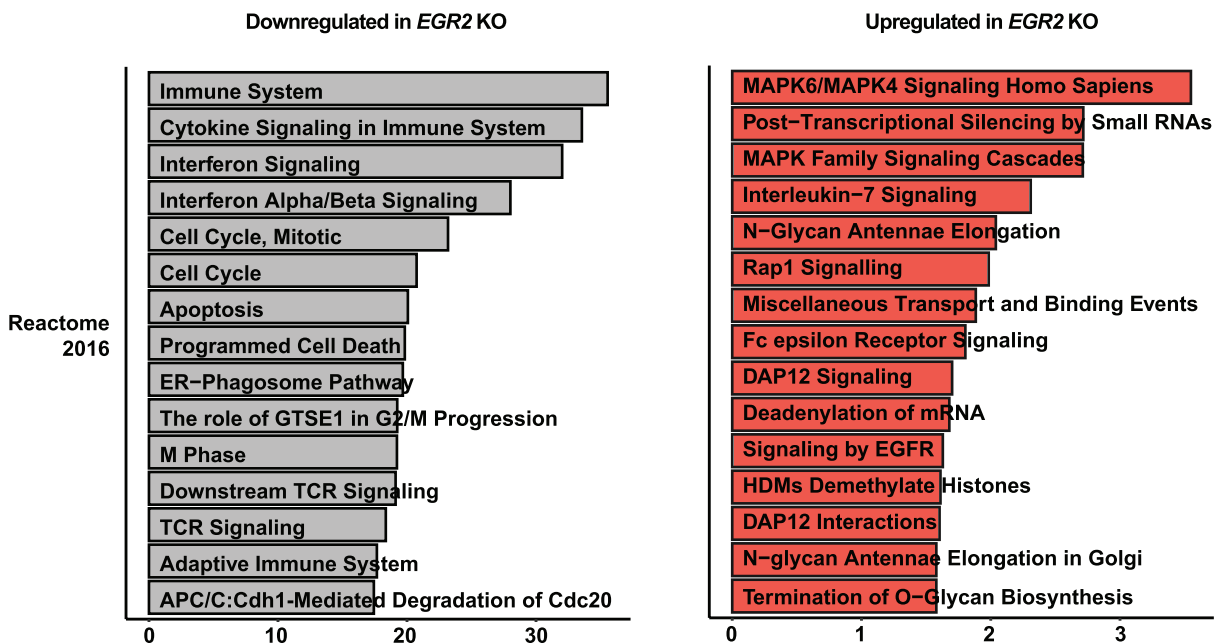

B

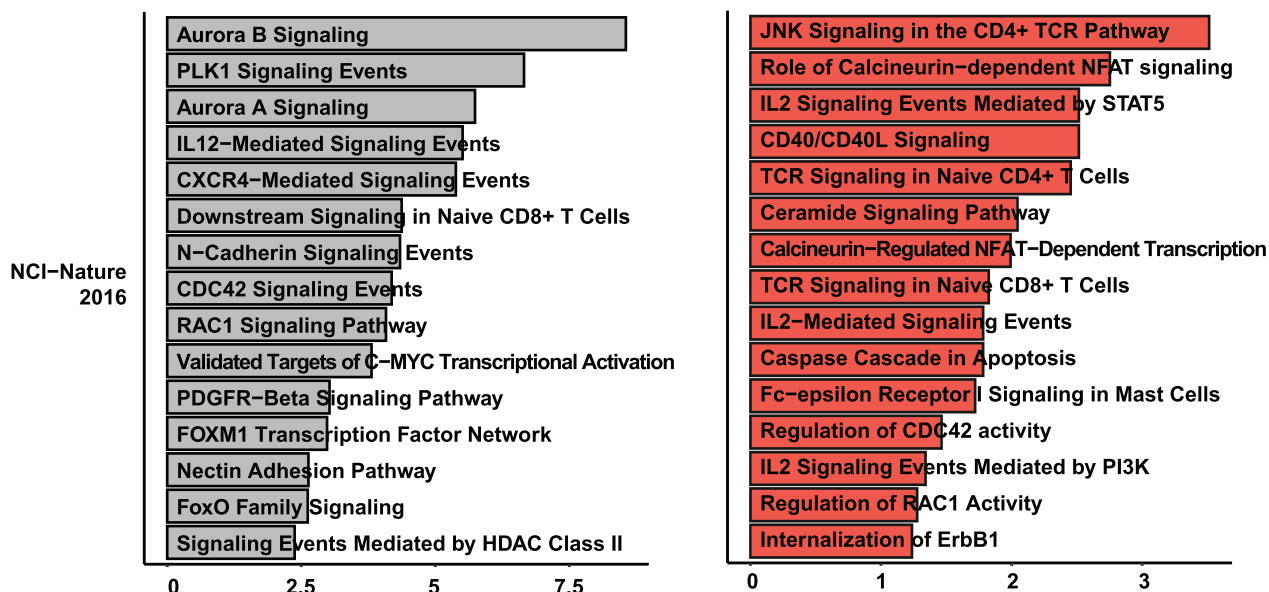

C

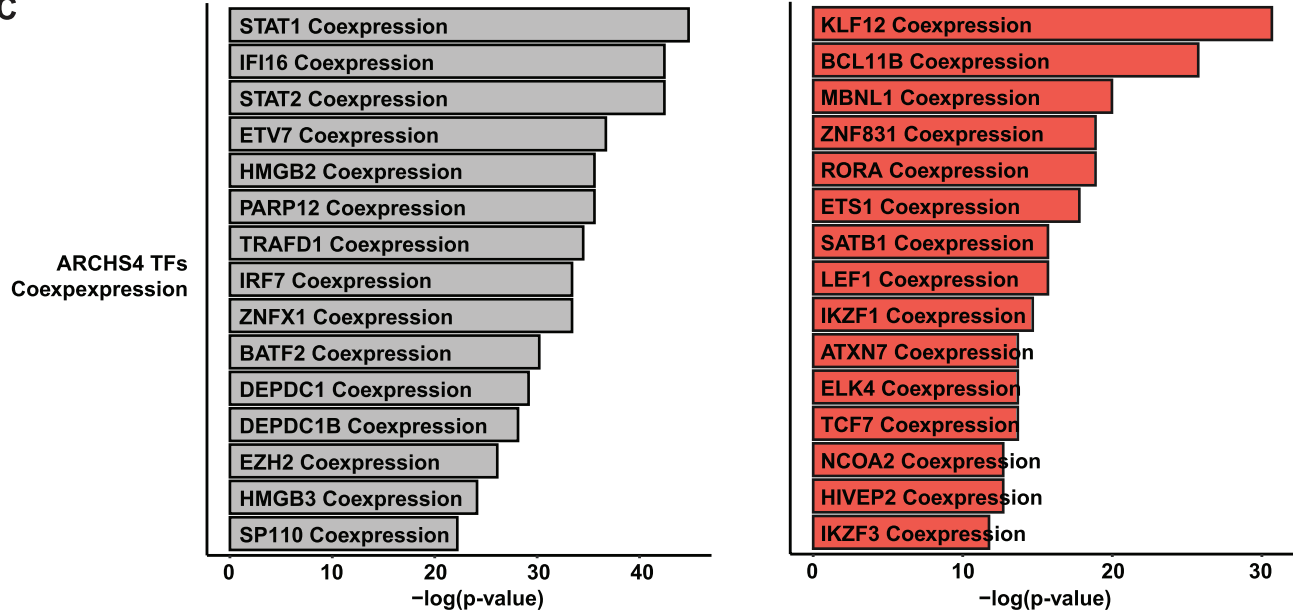

**Supplementary Figure 6. Pathways regulated by EGR2 in CD8<sup>+</sup> CAR T-cells.** (A-C) Top pathways differentially expressed in *EGR2* knockout CD8<sup>+</sup> CAR-T cells compared to *AAVS1* knockout CAR T-cells. Libraries used in this enrichment analysis: **A**, Reactome 2016. **B**, NCI-Nature Pathway Interaction Database 2015. **C**, ARCHS4 transcription factor (TF) co-expression.
